# Supplementary material for: CXCL2 attenuates osteoblast differentiation by inhibiting the ERK1/2 signaling pathway
Source: Oxford University Press journal article supplement (doi:10.1242/jcs.230490), 2019-07-10
Supplement: jcs230490supp.pdf [file jcs230490supp.pdf]

**Table S1.** Comparison of gender and age of control and osteoporosis group in cancellous and peripheral blood. \*P < 0.05 was considered statistically significant.

|                   | Gender (male/female) | Age (yo)    |
|-------------------|----------------------|-------------|
| <b>Cancellous</b> |                      |             |
| Control           | 3/8                  | 61.2 ± 10.2 |
| Osteoporosis      | 2/6                  | 62.5 ± 5.9  |
| P Value           | 0.912                | 0.748       |
| <b>Peripheral</b> |                      |             |
| Control           | 4/12                 | 62.9 ± 9.8  |
| Osteoporosis      | 2/5                  | 63.4 ± 6.2  |
| P Value           | 0.858                | 0.892       |

**Table S2.** Comparison of gender and age of cancellous and peripheral group. \*P < 0.05 was considered statistically significant.

|            | Gender (male/female) | Age (yo)   |
|------------|----------------------|------------|
| Cancellous | 5/14                 | 61.7 ± 8.5 |
| Peripheral | 6/17                 | 63.0 ± 8.7 |
| P Value    | 0.987                | 0.627      |

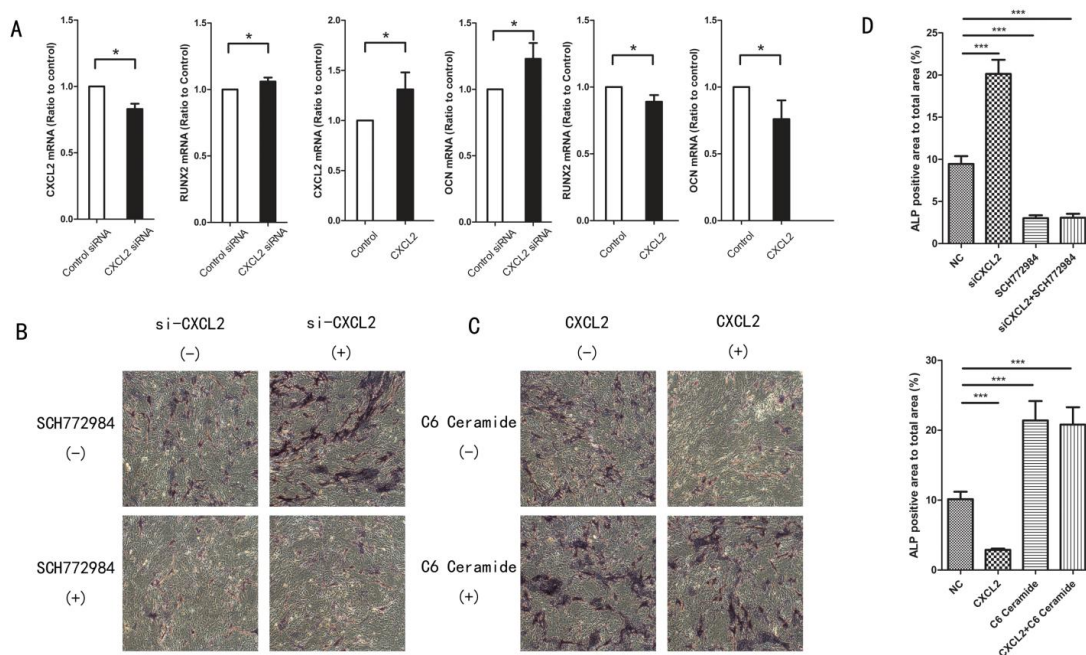

**Fig. S1. CXCL2 Attenuates Osteoblasts Differentiation by Inhibiting ERK Signaling Pathway.** (A) mRNA expression of CXCL2, RUNX2 and OCN in primary culture osteoblasts from qPCR analysis. To down-regulate CXCL2, cells were transfected with negative control siRNA or CXCL2 siRNA; to up-regulate CXCL2, cells were treated with pCMV-Flag-NC or pCMV-Flag-CXCL2. RNA was isolated 24 hours after transfection. n=6 per group. (B) ALP staining on the 7<sup>th</sup> day under inducing condition in siRNA CXCL2 transfected MC3T3-E1 cells and co-treated with SCH7729984. (C) ALP staining on the 7<sup>th</sup> day under inducing condition in pCMV-Flag-CXCL2 transfected MC3T3-E1 cells and co-treated with C6 ceramide. (D) quantitative analysis of ALP positive MC3T3-E1s out of total MC3T3-E1s under specific condition. \*P < 0.05, \*\*P < 0.001, \*\*\*P < 0.0001.
